# Supplementary material for: Promoting water splitting by transforming its presence status for enhanced hydrogen evolution
Source: Royal Society of Chemistry journal article supplement (doi:10.1039/d3nj05697j), 2024-01-01
Supplement: d3nj05697j1.pdf [file d3nj05697j1.pdf]

## **Supporting information for**

### **Promoting water splitting by transforming its presence status for enhanced hydrogen evolution**

Yanxia Han<sup>a\*</sup>, Lijie Hou<sup>a</sup>, Chao Shuai<sup>a</sup>, Xiaoli Song<sup>b</sup>, Chao Kong<sup>a\*</sup>

(<sup>a</sup> College of Chemistry and Chemical Engineering, Longdong University, Qingyang  
745000, China)

(<sup>b</sup> College of Chemistry and Chemical Engineering, Yulin University, Yulin 719000,  
China)

\*Corresponding author. E-mail address: [kongchao010@163.com](mailto:kongchao010@163.com).

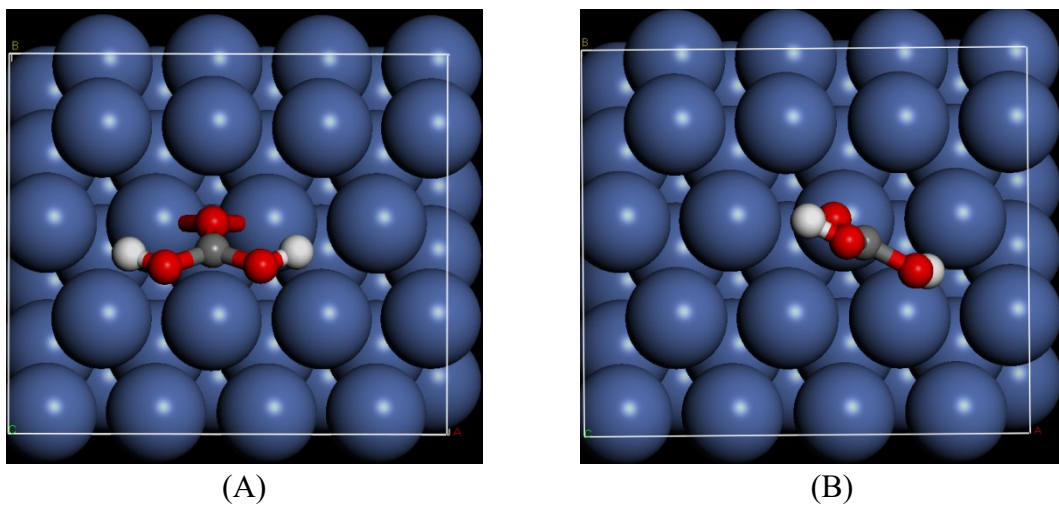

**Fig. S1** Optimized geometries of  $\text{H}_2\text{CO}_3$  adsorbed by bri (A) and top site (B) of Ni(111) surface; the calculated energies of geometries showed in (A) and (B) are -291.13780474 and -291.31539211 eV, respectively.

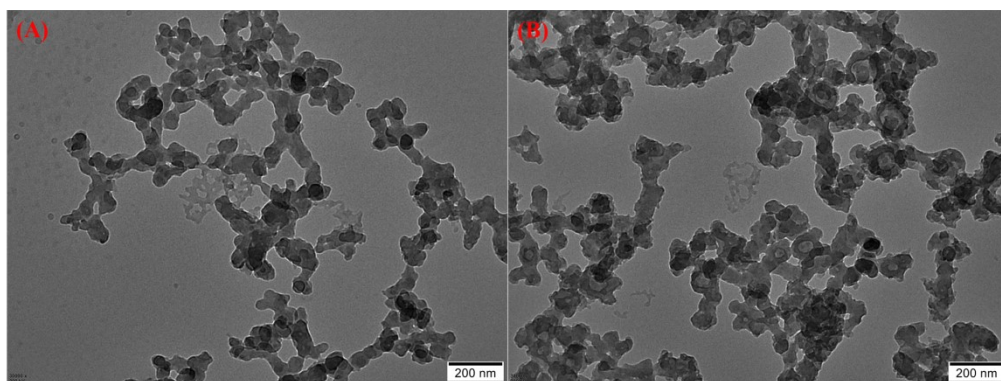

**Fig. S2** TEM images of Ni from EY-Ni (A) and EY-Ni/ $\text{CO}_2$  (B) systems

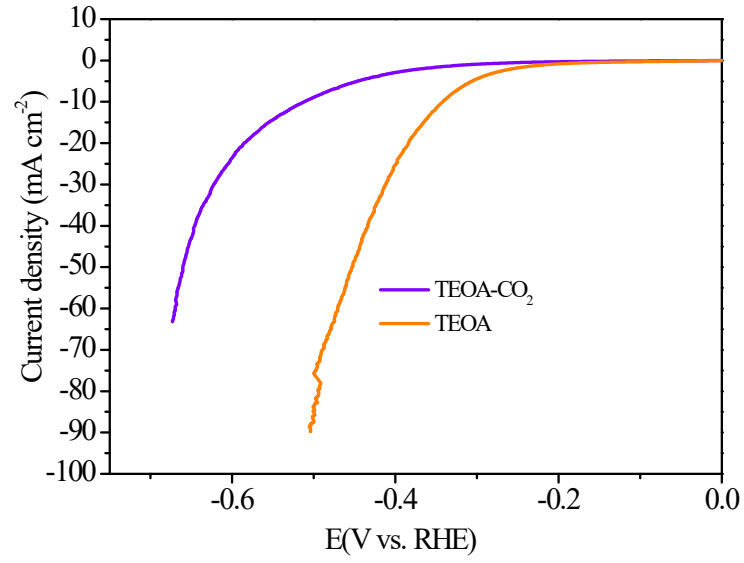

**Fig. S3** LSV curves of nickel foam (NF) in TEOA and TEOA-CO<sub>2</sub> solutions.

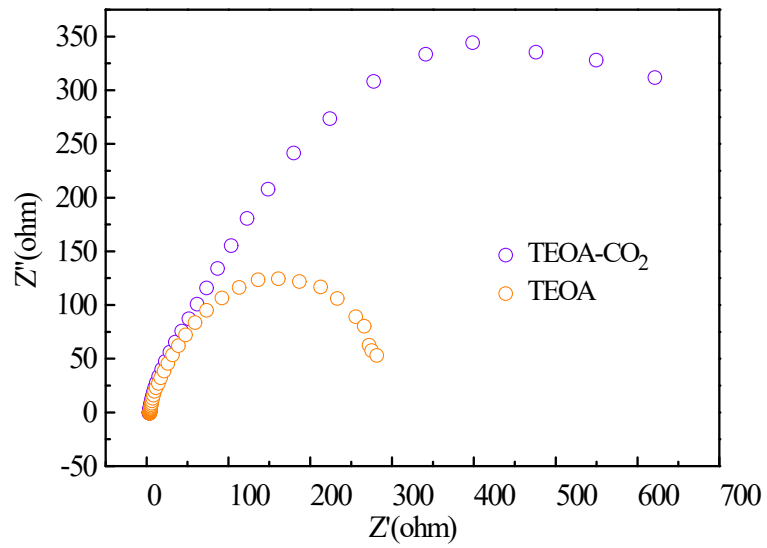

**Fig. S4** The Nyquist plots of NF in TEOA and TEOA-CO<sub>2</sub> solutions.
